# Supplementary material for: Impact of rainfall on root water uptake in two characteristic species of coal mining subsidence areas in Northwest China
Source: PeerJ. 2025 Oct 9;13:e20158. doi: 10.7717/peerj.20158 (PMC12515431; doi:10.7717/peerj.20158)
Supplement: Supplemental Information 1 — Root, soil water content, and water isotopes of stem and soil in coal mining subsidence and non-subsidence areas. [file peerj-13-20158-s001.xlsx]

## Sheet: root
S. bungeana	RLD (m m-3)	SD	RLD (m m-3)	SD	RMD (g m-3)	SD	RMD (g m-3)	SD
depth/cm	Non-subsidence		Subsidence		Non-subsidence		Subsidence
10	10501.6	1464.5	23115.3	2850.5	558.2	154.497	2010	191.736
20	6803	172.2	19952.4	2378.1	365.928	44.8408	1110	169.875
40	2787.9	5.68289	6315.9	337.1	114.437	6.74464	289.612	23.7636
60	2666	1232.2	5805	1451.4	145.862	56.2548	284.683	38.9782
80	1445.1	317.9	3166.2	679.4	182.328	29.7209	205.378	25.3131
100	820.1	83.8	3629.7	234.9	156.609	2.37174	235.025	45.287
A. desertorum	RLD (m m-3)	SD	RLD (m m-3)	SD	RMD (g m-3)	SD	RMD (g m-3)	SD
depth/cm	Non-subsidence		Subsidence		Non-subsidence		Subsidence
10	12130.1	2063.51	9809.01	737.985	1691.31	486.183	666.972	54.2962
20	7848.36	2589.48	8005.31	719.014	426.395	121.07	644.756	135.475
40	2320.49	37.4382	3599.88	625.37	254.666	56.5512	331.562	154.715
60	2349.97	473.713	2711.59	304.237	202.784	4.8176	149.42	18.2915
80	1084.1	438.202	1511.45	28.3924	107.395	24.6068	113.603	40.1567
100	523.489	268.448	1554.57	556.037	19.9004	7.30052	302.101	120.127

## Sheet: soil water content
S. bungeana	SWC/ %	SD	SWC/ %	SD	SWC/ %	SD	SWC/ %	SD
depth/cm	Non-subsidence before rainfall		Subsidence before rainfall		Non-subsidence after rainfall		Subsidence after rainfall
10	1.592	0.06305	1.902	0.445	15.34	0.74	18.005	1.893
20	2.28	0.432	2.291	0.396	12.35	0.699	13.098	0.03081
40	2.573	0.166	2.253	0.442	6.046	0.08338	6.119	2.79
60	2.599	0.241	2.354	0.498	3.229	0.34	3.414	0.951
80	3.045	0.58	2.316	0.51	2.775	0.03694	4.973	0.951
100	2.335	0.101	2.315	0.332	3.153	0.508	4.509	1.288
A. desertorum	SWC/ %	SD	SWC/ %	SD	SWC/ %	SD	SWC/ %	SD
depth/cm	Non-subsidence before rainfall		Subsidence before rainfall		Non-subsidence after rainfall		Subsidence after rainfall
10	1.54887	0.10732	2.71072	0.33896	15.8761	0.48834	16.7405	0.59716
20	2.36297	0.01535	2.61323	0.20424	8.29	0.89	11.0344	0.65182
40	2.90586	0.03837	2.60124	0.08446	3.76246	0.30698	4.07996	0.88441
60	2.8217	0.02933	2.41306	0.10448	3.49632	0.04444	3.17647	1.19156
80	2.57102	0.007	3.24726	0.3376	2.79306	0.02882	3.32323	0.39646
100	3.26345	0.03805	4.22482	0.62755	3.73884	0.07034	4.37271	0.73362

## Sheet: isotopes
S. bungeana	Soil water δ2H (‰)	Soil water δ18O (‰)	Soil water δ2H (‰)	Soil water δ18O (‰)	Soil water δ2H (‰)	Soil water δ18O (‰)	Soil water δ2H (‰)	Soil water δ18O (‰)
depth/cm	Non-subsidence before rainfall	Non-subsidence before rainfall	Subsidence before rainfall	Subsidence before rainfall	Non-subsidence after rainfall	Non-subsidence after rainfall	Subsidence after rainfall	Subsidence after rainfall
10	-25.536	8.12	-9.67592	9.88499	-51.6511	-6.70568	-49.1653	-5.60347
20	-15.3937	6.82712	-7.93592	8.42456	-44.1618	-3.87721	-48.2283	-5.70939
40	-19.0904	3.79922	-9.90466	6.0083	-28.3121	0.70482	-24.5439	0.85923
60	-28.6053	0.79415	-22.9543	1.52981	-32.3005	-1.81199	-27.2489	-1.54942
80	-41.3843	-2.20836	-29.8188	-0.22626	-45.4535	-3.52464	-32.7571	-2.42705
100	-48.2759	-2.51412	-36.1185	-1.4474	-46.6617	-3.758	-42.1029	-3.39298
	Stem water δ2H (‰)	Stem water δ18O (‰)	Stem water δ2H (‰)	Stem water δ18O (‰)	Stem water δ2H (‰)	Stem water δ18O (‰)	Stem water δ2H (‰)	Stem water δ18O (‰)
	Non-subsidence before rainfall	Non-subsidence before rainfall	Subsidence before rainfall	Subsidence before rainfall	Non-subsidence after rainfall	Non-subsidence after rainfall	Subsidence after rainfall	Subsidence after rainfall
	-21.066	6.45018	-12.1508	7.26914	-47.1123	-5.63524	-49.5001	-5.65092
	-22.2851	5.85154	-11.6508	7.36914	-50.924	-5.54798	-51.3118	-5.81603
			-12.6508	7.16914			-45.0451	-5.29248
A. desertorum	Soil water δ2H (‰)	Soil water δ18O (‰)	Soil water δ2H (‰)	Soil water δ18O (‰)	Soil water δ2H (‰)	Soil water δ18O (‰)	Soil water δ2H (‰)	Soil water δ18O (‰)
depth/cm	Non-subsidence before rainfall	Non-subsidence before rainfall	Subsidence before rainfall	Subsidence before rainfall	Non-subsidence after rainfall	Non-subsidence after rainfall	Subsidence after rainfall	Subsidence after rainfall
10	-19.6558	8.61438	-10.6025	10.5605	-47.493	-5.15406	-48.0298	-5.45545
20	-11.8927	6.8327	-17.0023	6.0371	-32.1708	-0.23236	-30.5818	0.00547
40	-15.8081	2.49589	-17.6323	3.77894	-21.5444	1.70858	-25.7557	0.15075
60	-31.2112	-0.09982	-30.7762	-0.03993	-30.549	-1.17168	-35.2036	-1.28905
80	-45.9398	-2.91569	-44.5302	-2.90064	-47.0493	-3.40028	-45.2771	-3.83879
100	-50.4844	-4.26346	-54.7263	-4.9476	-53.6714	-4.55732	-52.8108	-5.81044
	Stem water δ2H (‰)	Stem water δ18O (‰)	Stem water δ2H (‰)	Stem water δ18O (‰)	Stem water δ2H (‰)	Stem water δ18O (‰)	Stem water δ2H (‰)	Stem water δ18O (‰)
	Non-subsidence before rainfall	Non-subsidence before rainfall	Subsidence before rainfall	Subsidence before rainfall	Non-subsidence after rainfall	Non-subsidence after rainfall	Subsidence after rainfall	Subsidence after rainfall
	-44.9923	-2.80925	-46.8667	-4.04339	-50.4162	-4.41996	-51.0204	-4.84165
	-42.1174	-3.46105	-41.1117	-4.70216	-46.298	-4.35583	-47.1976	-4.64077
	-43.5548	-3.13515	-42.1048	-3.31548	-48.3571	-4.38789	-47.3245	-4.77312
